# Supplementary material
Source: PubMed Central journal article supplement (PMC4112102)
Supplement: NIHMS543063-supplement-Supplementary_Tables.pdf [file NIHMS543063-supplement-Supplementary_Tables.pdf]

## SUPPLEMENTAL MATERIAL

### Supplemental Tables

*Supplementary Table 1: Description of probands (cases/controls) in participating GWA studies:*

| Phenotype                  | Cohort name | N cases | N controls | %female   | Mean age  | Study design     |
|----------------------------|-------------|---------|------------|-----------|-----------|------------------|
| <b>Ischaemic stroke</b>    |             |         |            |           |           |                  |
|                            | ARIC        | 385     | 8,803      | 39.7/53.5 | 57.3/54.1 | population-based |
|                            | ASGC        | 1,162   | 1,244      | 40.8/49.8 | 72.9/70.2 | cross-sectional  |
|                            | BRAINS      | 361     | 444        | 44.1/64.2 | 74.4/65.0 | cross-sectional  |
|                            | CHS         | 454     | 2,817      | 55.0/55.0 | 81.6/85.8 | population-based |
|                            | deCODE      | 2,391   | 26,970     | 45.0/62.0 | 73.3/57.3 | cross-sectional  |
|                            | FHS         | 171     | 4,164      | 56.7/54.9 | 79.6/71.9 | population-based |
|                            | MGH/GASROS  | 516     | 1,202      | 39.7/40.9 | 66.7/47.5 | cross-sectional  |
|                            | GEOS        | 448     | 498        | 38.6/43.4 | 41.0/39.5 | cross-sectional  |
|                            | HPS         | 578     | 468        | 25.0/33.0 | 64.9/59.2 | cross-sectional  |
|                            | HVH         | 566     | 1,290      | 66.3/52.3 | 69.2/66.6 | cross-sectional  |
|                            | MILANO      | 372     | 407        | 37.2/12.3 | 57.4/50.8 | cross-sectional  |
|                            | ROTTERDAM   | 367     | 5,396      | 54.8/59.7 | 70.8/69.0 | population-based |
|                            | ISGS/SWISS  | 1,070   | 2,329      | 42.8/52.0 | 66.5/64.8 | cross-sectional  |
|                            | WTCCC2-D    | 1,174   | 797        | 38.1/48.6 | 66.7/62.7 | cross-sectional  |
|                            | WTCCC2-UK   | 2,374   | 5,175      | 46.2/50.5 | 72.2/52.0 | cross-sectional  |
| <b>Large artery stroke</b> |             |         |            |           |           |                  |
|                            | ARIC        | 31      | 8,803      | 41.9/53.5 | 57.8/54.1 | population-based |
|                            | ASGC        | 421     | 1,244      | 31.3/49.8 | 73.2/70.2 | cross-sectional  |
|                            | BRAINS      | 120     | 444        | 47.5/64.2 | 77.7/65.0 | cross-sectional  |
|                            | deCODE      | 255     | 26,970     | 38.8/62.0 | 70.5/57.3 | cross-sectional  |
|                            | MGH/GASROS  | 95      | 1,202      | 41.1/40.9 | 66.8/47.5 | cross-sectional  |
|                            | GEOS        | 37      | 498        | 32.4/43.4 | 45.2/39.5 | cross-sectional  |
|                            | HVH         | 61      | 1,290      | 55.7/52.3 | 67.9/66.6 | cross-sectional  |
|                            | MILANO      | 74      | 407        | 24.0/12.3 | 63.5/50.8 | cross-sectional  |
|                            | ISGS/SWISS  | 229     | 2,329      | 40.8/52.0 | 69.1/64.8 | cross-sectional  |
|                            | WTCCC2-D    | 346     | 797        | 29.3/48.6 | 65.7/62.7 | cross-sectional  |
|                            | WTCCC2-UK   | 498     | 5,175      | 33.8/50.5 | 68.2/52.0 | cross-sectional  |

(continued) Supplementary Table 1:

| Phenotype                      | Cohort name         | N cases | N controls | %female    | Mean age  | Study design     |
|--------------------------------|---------------------|---------|------------|------------|-----------|------------------|
| <b>Cardioembolic stroke</b>    |                     |         |            |            |           |                  |
|                                | ARIC                | 93      | 8,803      | 41.9/53.5  | 57.8/54.1 | population-based |
|                                | ASGC                | 240     | 1,244      | 31.3/49.8  | 73.2/70.2 | cross-sectional  |
|                                | BRAINS              | 29      | 444        | 47.5/64.2  | 77.7/65.0 | cross-sectional  |
|                                | CHS                 | 147     | 2,817      | 55.0/55.0  | 81.6/85.8 | population-based |
|                                | deCODE              | 399     | 26,970     | 38.8/62.0  | 70.5/57.3 | cross-sectional  |
|                                | FHS                 | 48      | 4,164      | 56.7/54.9  | 79.6/71.9 | population-based |
|                                | MGH/GASROS          | 169     | 1,202      | 41.1/40.9  | 66.8/47.5 | cross-sectional  |
|                                | GEOS                | 90      | 498        | 32.4/43.4  | 45.2/39.5 | cross-sectional  |
|                                | HVH                 | 88      | 1,290      | 55.7/52.3  | 67.9/66.6 | cross-sectional  |
|                                | MILANO              | 25      | 407        | 24.0/12.3  | 63.5/50.8 | cross-sectional  |
|                                | ISGS/SWISS          | 247     | 2,329      | 40.8/52.0  | 69.1/64.8 | cross-sectional  |
|                                | WTCCC2-D            | 330     | 797        | 29.3/48.6  | 65.7/62.7 | cross-sectional  |
|                                | WTCCC2-UK           | 460     | 5,175      | 33.8/50.5  | 68.2/52.0 | cross-sectional  |
| <b>Coronary artery disease</b> |                     |         |            |            |           |                  |
|                                | ADVANCE             | 278     | 312        | 57.9/ 59.0 | 45.8/45.3 | cross-sectional  |
|                                | CADomics            | 2,078   | 2,952      | 21.9/ 50.5 | 60.8/55.3 | cross-sectional  |
|                                | CHARGE              | 2,287   | 22,024     | 33.4/ 59.6 | 60.0/63.0 | population-based |
|                                | deCODE              | 6,640   | 27,611     | 36.3/ 61.9 | 74.8/53.7 | cross-sectional  |
|                                | GERMIFS I           | 884     | 1,604      | 49.4/ 50.8 | 50.2/62.6 | cross-sectional  |
|                                | GERMIFS II          | 1,222   | 1,287      | 33.1/ 48.3 | 51.4/51.2 | cross-sectional  |
|                                | GERMIFS III (KORA)  | 1,157   | 1,748      | 20.1/ 48.9 | 58.6/55.9 | population-based |
|                                | LURIC/ AtheroRemo 1 | 652     | 213        | 20.3/ 46.0 | 61.0/58.3 | cross-sectional  |
|                                | LURIC/ AtheroRemo 2 | 486     | 296        | 23.4/ 48.6 | 63.7/56.4 | cross-sectional  |
|                                | MedStar             | 874     | 447        | 33.0/ 54.6 | 48.9/59.7 | cross-sectional  |
|                                | MIGen               | 1,274   | 1,407      | 37.2/ 39.9 | 42.4/43.0 | cross-sectional  |
|                                | OHGS1               | 1,542   | 1,455      | 24.1/ 48.0 | 48.7/75.0 | cross-sectional  |
|                                | PennCATH            | 933     | 468        | 23.7/ 51.9 | 52.7/61.7 | cross-sectional  |
|                                | WTCCC               | 1,926   | 2,938      | 20.7/ 50.0 | 49.8/NA   | cross-sectional  |
|                                | HPS                 | 2,704   | 2,887      | 20.0/49.0  | 64.1/NA   | cross-sectional  |
|                                | LOLIPOP             | 2,741   | 3,696      | 18.0/14.0  | 59.3/52.4 | cross-sectional  |
|                                | PROCARDIS           | 5,720   | 4,381      | 25.0/44.0  | 61.9/NA   | cross-sectional  |

Both the METASTROKE and CARDIoGRAM/C4D cohorts have been previously described, including full details of case and control cohorts. Readers are referred to the following publications for full details: METASTROKE <sup>1</sup>; CARDIoGRAM <sup>2</sup>; C4D <sup>3</sup>.

**Supplementary Table II:** Association signals and directional consistency of effects of top variants for coronary artery disease, ischaemic stroke, and large artery stroke subtype. Results are shown for the CARDIoGRAM<sup>2</sup> and METASTROKE<sup>1</sup> samples. Heterogeneity is measured using  $I^2$ , non-significant heterogeneity values are underlined

| Lead SNPs                                                                               | Band     | Gene in region      | Minor Allele | Coronary Artery Disease |                    |                                                                  | Ischaemic Stroke |                    |                                                                  | Large Artery Stroke |                    |                                                                  |
|-----------------------------------------------------------------------------------------|----------|---------------------|--------------|-------------------------|--------------------|------------------------------------------------------------------|------------------|--------------------|------------------------------------------------------------------|---------------------|--------------------|------------------------------------------------------------------|
|                                                                                         |          |                     |              | p-value                 | Odds ratio (95%CI) | Effects go in same direction <sup>1</sup> (heterogeneity $I^2$ ) | p-value          | Odds ratio (95%CI) | Effects go in same direction <sup>2</sup> (heterogeneity $I^2$ ) | p-value             | Odds ratio (95%CI) | Effects go in same direction <sup>2</sup> (heterogeneity $I^2$ ) |
| <b>Top variants (known loci) for CAD/MI in the CARDIoGRAMplusC4D sample<sup>4</sup></b> |          |                     |              |                         |                    |                                                                  |                  |                    |                                                                  |                     |                    |                                                                  |
| rs17114036                                                                              | 1p32.2   | PPAP2B              | G            | <b>9.78E-09</b>         | 0.87 [0.82-0.91]   | -                                                                | 0.1622           | 0.96 [0.90-1.01]   | yes (86.1%)                                                      | 0.1334              | 0.91 [0.81-1.02]   | yes ( <u>0.0%</u> )                                              |
| rs1122608                                                                               | 19p13.2  | LDLR/SMARCA4        | T            | <b>3.32E-11</b>         | 0.88 [0.85-0.92]   | -                                                                | 0.00235          | 0.94 [0.90-0.98]   | yes (82.6%)                                                      | 0.01682             | 0.91 [0.83-0.98]   | yes ( <u>0.0%</u> )                                              |
| rs12413409                                                                              | 10q24.32 | CYP17A1/CNNM2/NT5C2 | A            | <b>1.24E-06</b>         | 0.89 [0.84-0.93]   | -                                                                | 0.0603           | 0.95 [0.89-1.00]   | yes ( <u>66.4%</u> )                                             | <b>0.00049</b>      | 0.80 [0.70-0.90]   | yes ( <u>57.6%</u> )                                             |
| rs12190287                                                                              | 6q23.2   | TCF21               | G            | <b>2.32E-09</b>         | 0.90 [0.87-0.93]   | -                                                                | 0.8241           | 1.00 [0.97-1.04]   | no (94.7%)                                                       | 0.8139              | 0.99 [0.91-1.07]   | yes (77.7%)                                                      |
| rs264                                                                                   | 8p21.3   | LPL                 | A            | <b>2.92E-07</b>         | 0.90 [0.87-0.94]   | -                                                                | 0.3092           | 0.98 [0.93-1.02]   | yes (84.7%)                                                      | 0.282               | 0.95 [0.86-1.05]   | yes ( <u>0.0%</u> )                                              |
| rs602633                                                                                | 1p13.3   | SORT1               | T            | <b>1.42E-08</b>         | 0.90 [0.87-0.93]   | -                                                                | 0.9639           | 1.00 [0.96-1.03]   | yes (93.3%)                                                      | 0.01718             | 0.90 [0.83-0.98]   | yes ( <u>0.0%</u> )                                              |
| rs9369640                                                                               | 6p24.1   | PHACTR1             | C            | <b>2.69E-11</b>         | 0.91 [0.88-0.93]   | -                                                                | 0.3374           | 1.02 [0.98-1.05]   | no (96.2%)                                                       | 0.1762              | 1.05 [0.98-1.12]   | no (93.1%)                                                       |
| rs11556924                                                                              | 7q32.2   | ZC3HC1              | T            | <b>2.55E-10</b>         | 0.91 [0.89-0.94]   | -                                                                | 0.2172           | 0.98 [0.94-1.01]   | yes (87.3%)                                                      | 0.1671              | 0.95 [0.87-1.02]   | yes ( <u>0.0%</u> )                                              |
| rs501120                                                                                | 10q11.21 | CXCL12              | C            | <b>1.54E-06</b>         | 0.92 [0.88-0.95]   | -                                                                | 0.6325           | 1.01 [0.96-1.06]   | no (89.8%)                                                       | 0.8433              | 0.99 [0.90-1.09]   | yes ( <u>50.2%</u> )                                             |
| rs11206510                                                                              | 1p32.3   | PCSK9               | C            | <b>2.03E-04</b>         | 0.92 [0.88-0.97]   | -                                                                | 0.48             | 1.02 [0.97-1.06]   | no (88.5%)                                                       | 0.365               | 1.04 [0.95-1.14]   | no (82.4%)                                                       |
| rs7692387                                                                               | 4q32.1   | GUCY1A3             | A            | <b>1.07E-05</b>         | 0.92 [0.89-0.96]   | -                                                                | 0.0459           | 0.96 [0.92-1.00]   | yes ( <u>43.8%</u> )                                             | 0.4768              | 1.03 [0.95-1.13]   | no (81.0%)                                                       |
| rs9515203                                                                               | 13q34    | COL4A1/COL4A2       | C            | <b>3.30E-05</b>         | 0.92 [0.89-0.96]   | -                                                                | 0.8864           | 1.00 [0.96-1.05]   | no (85.1%)                                                       | 0.0835              | 1.08 [0.99-1.18]   | no (90.4%)                                                       |
| rs12936587                                                                              | 17p11.2  | RAI1-PEMT-RASD1     | A            | <b>1.98E-07</b>         | 0.93 [0.90-0.96]   | -                                                                | 0.0051           | 0.95 [0.92-0.98]   | yes ( <u>21.5%</u> )                                             | <b>2.7E-05</b>      | 0.86 [0.80-0.92]   | yes (75.6%)                                                      |
| rs4252120                                                                               | 6q25.3   | PLG                 | C            | <b>2.73E-05</b>         | 0.93 [0.91-0.96]   | -                                                                | 0.5753           | 0.99 [0.96-1.03]   | yes (83.4%)                                                      | 0.8729              | 0.99 [0.92-1.07]   | yes ( <u>55.2%</u> )                                             |
| rs7173743                                                                               | 15q25.1  | ADAMTS7             | C            | <b>6.70E-08</b>         | 0.93 [0.90-0.95]   | -                                                                | 0.3965           | 0.99 [0.96-1.02]   | yes (88.0%)                                                      | 0.5462              | 1.02 [0.95-1.09]   | no (85.1%)                                                       |
| rs12205331                                                                              | 6p21.31  | ANKS1A              | T            | <b>6.39E-06</b>         | 0.93 [0.90-0.96]   | -                                                                | 0.052            | 0.96 [0.92-1.00]   | yes ( <u>42.1%</u> )                                             | 0.182               | 0.94 [0.87-1.03]   | yes ( <u>0.0%</u> )                                              |
| rs515135                                                                                | 2p24.1   | APOB                | T            | <b>9.12E-04</b>         | 0.94 [0.90-0.97]   | -                                                                | 0.8171           | 1.01 [0.96-1.05]   | no (81.9%)                                                       | 0.4072              | 1.04 [0.95-1.14]   | no (76.0%)                                                       |
| rs10947789                                                                              | 6p21.2   | KCNK5               | C            | <b>1.07E-03</b>         | 0.94 [0.91-0.97]   | -                                                                | 0.6972           | 0.99 [0.96-1.03]   | yes (81.4%)                                                      | 0.7174              | 0.99 [0.91-1.07]   | yes ( <u>26.3%</u> )                                             |
| rs2954029                                                                               | 8q24.13  | TRIB1               | T            | <b>1.28E-05</b>         | 0.94 [0.92-0.97]   | -                                                                | 0.1544           | 0.98 [0.95-1.01]   | yes ( <u>62.0%</u> )                                             | 0.1935              | 0.96 [0.89-1.02]   | yes ( <u>0.0%</u> )                                              |
| rs15563                                                                                 | 17q21.32 | UBE2Z               | A            | <b>1.81E-05</b>         | 0.94 [0.91-0.96]   | -                                                                | 0.9662           | 1.00 [0.97-1.03]   | yes (88.3%)                                                      | 0.1373              | 0.98 [0.89-1.02]   | yes ( <u>0.0%</u> )                                              |
| rs974819                                                                                | 11q22.3  | PDGFD               | T            | <b>7.00E-04</b>         | 1.05 [1.02-1.08]   | -                                                                | 0.1196           | 0.97 [0.94-1.00]   | no (90.8%)                                                       | 0.1557              | 1.05 [0.98-1.13]   | yes ( <u>0.0%</u> )                                              |
| rs11203042                                                                              | 10q23.31 | LIPA                | T            | <b>6.51E-05</b>         | 1.06 [1.03-1.09]   | -                                                                | 0.6087           | 1.01 [0.98-1.04]   | yes (79.2%)                                                      | 0.3286              | 1.03 [0.97-1.11]   | yes ( <u>0.0%</u> )                                              |
| rs2047009                                                                               | 10q11.21 | CXCL12              | T            | <b>4.79E-06</b>         | 1.06 [1.03-1.09]   | -                                                                | 0.0705           | 1.03 [1.00-1.06]   | yes ( <u>57.1%</u> )                                             | 0.537               | 1.02 [0.96-1.09]   | yes ( <u>15.5%</u> )                                             |
| rs4845625                                                                               | 1q21.3   | IL6R                | T            | <b>1.93E-05</b>         | 1.06 [1.03-1.09]   | -                                                                | 0.2875           | 1.02 [0.99-1.05]   | yes ( <u>72.0%</u> )                                             | 0.9699              | 1.00 [0.94-1.07]   | yes ( <u>56.4%</u> )                                             |
| rs2252641                                                                               | 2q22.3   | ZEB2-AC074093.1     | C            | <b>1.19E-05</b>         | 1.06 [1.03-1.09]   | -                                                                | 0.4874           | 1.01 [0.98-1.04]   | yes (80.6%)                                                      | 0.1326              | 0.95 [0.89-1.02]   | no (88.9%)                                                       |
| rs1561198                                                                               | 2p11.2   | VAMP5-VAMP8-GGCX    | T            | <b>6.05E-04</b>         | 1.06 [1.03-1.09]   | -                                                                | 0.6505           | 0.99 [0.96-1.02]   | no (88.3%)                                                       | 0.8011              | 1.01 [0.94-1.08]   | yes ( <u>33.3%</u> )                                             |
| rs9319428                                                                               | 13q12.2  | FLT1                | A            | <b>4.47E-05</b>         | 1.06 [1.03-1.11]   | -                                                                | 0.3271           | 0.98 [0.95-1.01]   | no (91.2%)                                                       | 0.1348              | 1.06 [0.98-1.14]   | yes ( <u>0.0%</u> )                                              |
| rs6544713                                                                               | 2p21     | ABCG5-ABCG8         | T            | <b>5.20E-03</b>         | 1.06 [1.03-1.10]   | -                                                                | 0.5859           | 1.01 [0.97-1.05]   | yes (77.1%)                                                      | 0.4944              | 1.03 [0.95-1.11]   | yes ( <u>0.0%</u> )                                              |
| rs2246833                                                                               | 10q23.31 | LIPA                | T            | <b>5.28E-05</b>         | 1.07 [1.04-1.10]   | -                                                                | 0.0202           | 1.04 [1.01-1.08]   | yes ( <u>20.5%</u> )                                             | 0.1923              | 1.05 [0.98-1.13]   | yes ( <u>0.0%</u> )                                              |
| rs2505083                                                                               | 10p11.23 | KIAA1462            | C            | <b>2.40E-05</b>         | 1.07 [1.04-1.10]   | -                                                                | 0.073            | 1.03 [1.00-1.06]   | yes ( <u>66.4%</u> )                                             | 0.0975              | 1.06 [0.99-1.13]   | yes ( <u>0.0%</u> )                                              |
| rs2048327                                                                               | 6q25.3   | SLC22A3/LPAL2/LPA   | C            | <b>1.34E-06</b>         | 1.07 [1.05-1.10]   | -                                                                | 0.3984           | 0.99 [0.95-1.02]   | no (93.5%)                                                       | 0.1534              | 1.05 [0.98-1.13]   | yes ( <u>0.0%</u> )                                              |
| rs3184504                                                                               | 12q24.12 | chr12q24/SH2B3      | T            | <b>9.33E-07</b>         | 1.07 [1.04-1.11]   | -                                                                | <b>1.01E-06</b>  | 1.08 [1.05-1.12]   | yes ( <u>0.0%</u> )                                              | <b>0.00015</b>      | 1.14 [1.06-1.22]   | yes ( <u>59.2%</u> )                                             |
| rs273909                                                                                | 5q31.1   | SLC22A4-SLC22A5     | G            | <b>8.23E-03</b>         | 1.07 [1.02-1.11]   | -                                                                | 0.6286           | 0.99 [0.94-1.04]   | no (80.5%)                                                       | 0.0196              | 1.13 [1.02-1.26]   | yes ( <u>8.2%</u> )                                              |

|            |          |                    |   |                 |                  |   |                 |                  |             |                 |                  |             |
|------------|----------|--------------------|---|-----------------|------------------|---|-----------------|------------------|-------------|-----------------|------------------|-------------|
| rs2281727  | 17p13.3  | SMG6               | G | <b>1.30E-07</b> | 1.07 [1.04-1.10] | - | 0.1164          | 1.03 [0.99-1.06] | yes (76.0%) | 0.656           | 0.98 [0.92-1.06] | no (80.3%)  |
| rs17514846 | 15q26.1  | FURIN-FES          | A | <b>7.49E-05</b> | 1.07 [1.04-1.11] | - | 0.1882          | 1.02 [0.99-1.05] | yes (76.3%) | 0.1026          | 1.06 [0.99-1.13] | yes (0.0%)  |
| rs4773144  | 13q34    | COL4A1/COL4A2      | G | <b>2.34E-06</b> | 1.08 [1.05-1.12] | - | 0.7407          | 1.01 [0.96-1.05] | yes (85.1%) | 0.5777          | 0.97 [0.87-1.08] | no (73.2%)  |
| rs2023938  | 7p21.1   | HDAC9              | C | <b>2.10E-03</b> | 1.08 [1.03-1.13] | - | <b>1.65E-06</b> | 1.14 [1.08-1.20] | yes (44.7%) | <b>2.33E-09</b> | 1.38 [1.24-1.53] | yes (94.1%) |
| rs2895811  | 14q32.2  | HHIPL1             | C | <b>1.18E-05</b> | 1.09 [1.06-1.13] | - | 0.288           | 1.02 [0.99-1.05] | yes (88.4%) | 0.149           | 1.05 [0.98-1.13] | yes (0.0%)  |
| rs579459   | 9q34.2   | ABO                | C | <b>2.14E-07</b> | 1.10 [1.06-1.14] | - | <b>0.00026</b>  | 1.08 [1.04-1.12] | yes (0.0%)  | 0.0054          | 1.13 [1.04-1.22] | yes (0.0%)  |
| rs1878406  | 4q31.23  | EDNRA              | T | <b>1.02E-06</b> | 1.10 [1.06-1.14] | - | 0.1392          | 1.04 [0.99-1.08] | yes (72.8%) | 0.00151         | 1.17 [1.06-1.29] | yes (23.9%) |
| rs9818870  | 3q22.3   | MRAS               | T | <b>1.24E-07</b> | 1.11 [1.07-1.15] | - | 0.7623          | 1.01 [0.97-1.05] | yes (90.7%) | 0.4514          | 0.97 [0.88-1.06] | no (86.1%)  |
| rs6725887  | 2q33.1   | WDR12              | C | <b>2.37E-08</b> | 1.14 [1.10-1.19] | - | 0.1435          | 0.96 [0.92-1.01] | no (96.2%)  | 0.9847          | 1.00 [0.90-1.11] | yes (81.4%) |
| rs9326246  | 11q23.3  | ZNF259/APO5A/APOA1 | C | <b>3.40E-07</b> | 1.15 [1.09-1.21] | - | 0.2928          | 1.04 [0.97-1.11] | yes (81.1%) | 0.3523          | 0.93 [0.81-1.08] | no (85.3%)  |
| rs3217992  | 9p21.3   | CDKN2BAS           | T | <b>2.21E-29</b> | 1.17 [1.14-1.21] | - | 0.0314          | 1.04 [1.00-1.07] | yes (96.6%) | 0.0036          | 1.11 [1.03-1.19] | yes (56.0%) |
| rs9982601  | 21q22.11 | gene_desert/KCNE2  | T | <b>2.52E-10</b> | 1.18 [1.12-1.24] | - | 0.552           | 0.99 [0.94-1.03] | no (96.0%)  | 0.1801          | 0.93 [0.84-1.03] | no (93.5%)  |
| rs1333049  | 9p21.3   | CDKN2BAS           | C | <b>2.96E-56</b> | 1.24 [1.21-1.28] | - | 0.0053          | 1.05 [1.01-1.09] | yes (98.2%) | <b>3.7E-06</b>  | 1.19 [1.11-1.28] | yes (3.2%)  |

#### Top variants ( $p < 10^{-5}$ ) for all ischaemic stroke in the METASTROKE sample

|            |          |                |   |                 |                  |             |                 |                  |   |         |                  |            |
|------------|----------|----------------|---|-----------------|------------------|-------------|-----------------|------------------|---|---------|------------------|------------|
| rs225132   | 1p36.23  | ERRFI1         | G | 0.3922          | 0.99 [0.96-1.03] | yes (93.2%) | <b>6.40E-08</b> | 0.89 [0.86-0.93] | - | 0.02563 | 0.90 [0.83-0.99] | yes (0.0%) |
| rs16851055 | 3q23     | SPSB4          | A | 0.2321          | 0.98 [0.93-1.03] | yes (85.9%) | <b>7.01E-07</b> | 0.90 [0.86-0.94] | - | 0.00080 | 0.86 [0.78-0.94] | yes (0.0%) |
| rs161802   | 1p36.23  | PARK7          | T | 0.2638          | 0.99 [0.95-1.02] | yes (91.9%) | <b>2.13E-07</b> | 0.90 [0.86-0.93] | - | 0.03699 | 0.91 [0.83-0.99] | yes (0.0%) |
| rs4792143  | 17p12    | FLJ45455       | T | 0.3146          | 0.99 [0.95-1.02] | yes (88.6%) | <b>5.07E-06</b> | 0.91 [0.87-0.95] | - | 0.0092  | 0.89 [0.91-0.97] | yes (0.0%) |
| rs17696736 | 12q24.13 | chr12q24/SH2B3 | G | <b>6.56E-08</b> | 1.07 [1.04-1.10] | yes (37.3%) | <b>5.96E-08</b> | 1.10 [1.06-1.14] | - | 0.0024  | 1.11 [1.04-1.20] | yes (0.0%) |
| rs12646447 | 4q25     | PITX2          | C | 0.3897          | 1.02 [0.98-1.06] | yes (92.4%) | <b>3.19E-08</b> | 1.14 [1.09-1.20] | - | 0.0053  | 1.15 [1.04-1.28] | yes (0.0%) |

#### Top variants ( $p < 10^{-5}$ ) for large artery stroke in the METASTROKE sample

|            |         |                  |   |                 |                  |             |         |                  |             |                 |                  |   |
|------------|---------|------------------|---|-----------------|------------------|-------------|---------|------------------|-------------|-----------------|------------------|---|
| rs1005224  | 14q24.3 | TTLL5            | T | 0.6857          | 0.99 [0.96-1.02] | yes (94.5%) | 0.0616  | 0.97 [0.93-1.00] | yes (92.3%) | <b>1.47E-06</b> | 0.83 [0.77-0.90] | - |
| rs1465330  | 14q24.3 | ZDHHC22          | A | 0.9722          | 1.00 [0.97-1.03] | yes (94.3%) | 0.0355  | 0.96 [0.93-1.00] | yes (90.9%) | <b>3.78E-06</b> | 0.84 [0.78-0.91] | - |
| rs4304924  | 13q31.1 | RNF219           | G | 0.4124          | 0.98 [0.94-1.02] | yes (91.8%) | 3.9E-05 | 0.93 [0.91-0.97] | yes (83.1%) | <b>4.50E-06</b> | 0.85 [0.79-0.91] | - |
| rs7791394  | 7q21.11 | MAGI2            | T | 0.9297          | 0.99 [0.97-1.02] | no (94.5%)  | 0.00083 | 1.06 [1.02-1.09] | yes (85.2%) | <b>9.91E-06</b> | 1.17 [1.09-1.26] | - |
| rs632728   | 6p21.1  | SUPT3H           | T | 0.2024          | 0.99 [0.97-1.02] | no (95.4%)  | 0.1211  | 1.03 [0.99-1.07] | yes (92.1%) | <b>2.14E-06</b> | 1.19 [1.11-1.28] | - |
| rs1333047  | 9p21.3  | chr9p21          | T | <b>1.44E-53</b> | 1.24 [1.20-1.27] | yes (0.0%)  | 0.0063  | 1.05 [1.01-1.08] | yes (90.4%) | <b>1.64E-06</b> | 1.20 [1.11-1.29] | - |
| rs2107595  | 7p21.1  | HDAC9            | A | 0.0419          | 1.05 [1.01-1.09] | yes (96.8%) | 4.4E-06 | 1.11 [1.06-1.16] | yes (94.5%) | <b>2.39E-12</b> | 1.39 [1.27-1.52] | - |
| rs6792835  | 3q28    | LPP              | G | 0.5078          | 1.01 [0.95-1.08] | yes (93.8%) | 0.3355  | 1.04 [0.96-1.12] | yes (92.2%) | <b>1.16E-05</b> | 1.46 [1.23-1.73] | - |
| rs7937106  | 11q22.3 | ALKBH8           | C | 0.0884          | 1.09 [0.98-1.21] | yes (93.7%) | 0.00136 | 1.18 [1.07-1.30] | yes (90.8%) | <b>5.74E-08</b> | 1.69 [1.40-2.04] | - |
| rs10179686 | 2q21.2  | TMEM163          | T | 0.7276          | 1.03 [0.93-1.13] | yes (93.4%) | 0.4189  | 1.06 [0.93-1.20] | yes (91.8%) | <b>8.20E-06</b> | 1.69 [1.34-2.13] | - |
| rs17167021 | 5q21.1  | Chr5 gene desert | G | 0.4010          | 1.08 [0.94-1.23] | yes (92.8%) | 0.1733  | 1.11 [0.96-1.29] | yes (91.3%) | <b>1.37E-06</b> | 1.81 [1.42-2.30] | - |

<sup>1</sup>compared to IS or LAS respectively; <sup>2</sup>compared to CAD/MI; The ApoE-ApoC1 locus previously reported in <sup>4</sup>was not considered due to incomplete information in CARDIoGRAM; associations reaching study-wide significance ( $p < 0.00108$ ) are shown in bold. CAD=coronary artery disease; MI=myocardial infarction.

*Supplementary Table III: Influence of overlapping controls on meta-analysis results for the combined CAD/stroke phenotypes: results are shown for the same risk loci as in Table 2 and for two different scenarios.*

| rs_number                  | Band     | Gene in region      | Coronary Artery Disease & Stroke combined (p-value) |                                |
|----------------------------|----------|---------------------|-----------------------------------------------------|--------------------------------|
|                            |          |                     | 30,000<br>overlapping controls                      | 40,000<br>overlapping controls |
| <b>Ischemic Stroke</b>     |          |                     |                                                     |                                |
| rs1333049                  | 9p21.3   | 9p21                | 1.00E-42                                            | 1.37E-41                       |
| rs11065987                 | 12q24.12 | chr12q24/SH2B3      | 7.80E-14                                            | 1.72E-13                       |
| rs10455872                 | 6q25.3   | SLC22A3/LPAL2/LPA   | 7.68E-10                                            | 1.31E-09                       |
| rs1122608                  | 19p13.2  | LDLR/SMARCA4        | 8.70E-12                                            | 1.69E-11                       |
| rs4714955                  | 6p24.1   | PHACTR1             | 1.56E-08                                            | 2.47E-08                       |
| rs11556924                 | 7q32.2   | ZC3HC1              | 2.82E-08                                            | 4.38E-08                       |
| rs964184                   | 11q23.3  | ZNF259              | 4.70E-08                                            | 8.18E-08                       |
| rs579459                   | 9q34.2   | ABO                 | 1.35E-09                                            | 2.29E-09                       |
| rs2219939                  | 15q25.1  | ADAMTS7             | 1.03E-08                                            | 1.65E-08                       |
| rs7582720                  | 2q33.1   | WDR12               | 1.80E-08                                            | 2.84E-08                       |
| rs599839                   | 1p13.3   | SORT1               | 2.82E-07                                            | 3.83E-07                       |
| rs12190287                 | 6q23.2   | TCF21               | 2.53E-08                                            | 3.49E-08                       |
| rs12449964                 | 17p11.2  | RAI1-PEMT-RASD1     | 2.05E-08                                            | 3.22E-08                       |
| rs17114036                 | 1p32.2   | PPAP2B              | 2.06E-08                                            | 3.04E-08                       |
| rs9351814                  | 6q13     | C6orf155            | 5.80E-08                                            | 8.84E-08                       |
| <b>Large Artery Stroke</b> |          |                     |                                                     |                                |
| rs1333049                  | 9p21.3   | 9p21                | 4.37E-59                                            | 1.65E-58                       |
| rs10455872                 | 6q25.3   | SLC22A3/LPAL2/LPA   | 2.62E-14                                            | 3.52E-14                       |
| rs2107595                  | 7p21.1   | HDAC9               | 7.43E-05                                            | 8.07E-05                       |
| rs1122608                  | 19p13.2  | LDLR/SMARCA4        | 6.86E-12                                            | 8.74E-12                       |
| rs4714955                  | 6p24.1   | PHACTR1             | 4.09E-12                                            | 5.24E-12                       |
| rs12936587                 | 17p11.2  | RAI1-PEMT-RASD1     | 4.53E-10                                            | 5.54E-10                       |
| rs11065987                 | 12q24.12 | chr12q24/SH2B3      | 2.08E-10                                            | 2.56E-10                       |
| rs11556924                 | 7q32.2   | ZC3HC1              | 2.16E-10                                            | 2.66E-10                       |
| rs599839                   | 1p13.3   | SORT1               | 1.59E-10                                            | 1.97E-10                       |
| rs964184                   | 11q23.3  | ZNF259              | 9.48E-10                                            | 1.15E-09                       |
| rs12190287                 | 6q23.2   | TCF21               | 1.28E-08                                            | 1.51E-08                       |
| rs12413409                 | 10q24.32 | CYP17A1-CNNM2-NT5C2 | 1.50E-08                                            | 1.77E-08                       |
| rs6841581                  | 4q32.21  | EDNRA               | 5.52E-09                                            | 6.58E-09                       |
| rs17114036                 | 1p32.2   | PPAP2B              | 2.43E-08                                            | 2.85E-08                       |
| rs899997                   | 15q25.1  | ADAMTS7             | 1.31E-08                                            | 1.55E-08                       |
| rs7582720                  | 2q33.1   | WDR12               | 8.59E-09                                            | 1.02E-08                       |
| rs579459                   | 9q34.2   | ABO                 | 1.94E-08                                            | 2.29E-08                       |

## Supplemental Figures

### Supplementary Figure I

(A)

|            |       | CAD/MI p-value   |                     |
|------------|-------|------------------|---------------------|
|            |       | <0.01            | >0.01               |
| IS p-value | <0.01 | 205<br>(0.074%)  | 7,113<br>(2.57%)    |
|            | >0.01 | 4,113<br>(1.48%) | 265,610<br>(95.87%) |

p=3.59E-15

|  |         | CAD/MI p-value  |                     |
|--|---------|-----------------|---------------------|
|  |         | <0.0001         | >0.0001             |
|  | <0.0001 | 5<br>(0.0018%)  | 137<br>(0.049%)     |
|  | >0.0001 | 168<br>(0.061%) | 276,731<br>(99.89%) |

p=3.75E-08

(B)

|             |       | CAD/MI p-value   |                     |
|-------------|-------|------------------|---------------------|
|             |       | <0.01            | >0.01               |
| LAS p-value | <0.01 | 154<br>(0.056%)  | 7,268<br>(2.63%)    |
|             | >0.01 | 4,049<br>(1.46%) | 265,114<br>(95.85%) |

p=1.69E-04

|  |         | CAD/MI p-value  |                     |
|--|---------|-----------------|---------------------|
|  |         | <0.0001         | >0.0001             |
|  | <0.0001 | 2<br>(0.0007%)  | 136<br>(0.049%)     |
|  | >0.0001 | 169<br>(0.061%) | 276,278<br>(99.89%) |

p=3.40E-03

(C)

|             |       | CAD/MI p-value   |                     |
|-------------|-------|------------------|---------------------|
|             |       | <0.01            | >0.01               |
| CES p-value | <0.01 | 167<br>(0.060%)  | 7,578<br>(2.74%)    |
|             | >0.01 | 4,342<br>(1.57%) | 264,750<br>(95.63%) |

p=3.73E-04

|  |         | CAD/MI p-value  |                     |
|--|---------|-----------------|---------------------|
|  |         | <0.0001         | >0.0001             |
|  | <0.0001 | 0<br>(0%)       | 138<br>(0.050%)     |
|  | >0.0001 | 161<br>(0.058%) | 276,538<br>(99.89%) |

p=1

Supplementary Figure II

(A)

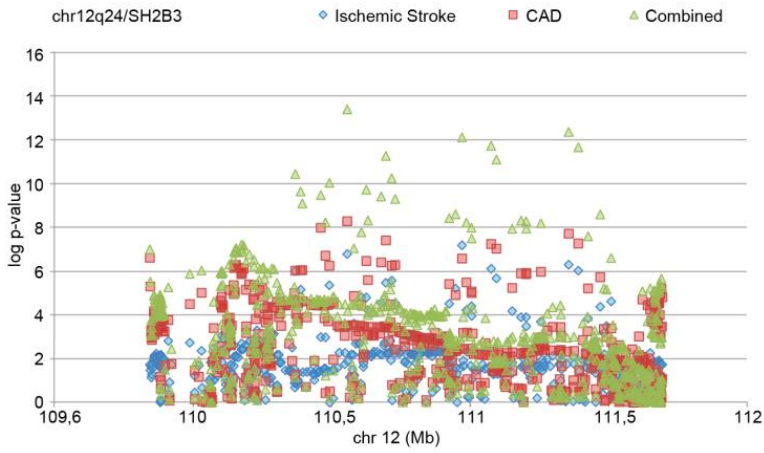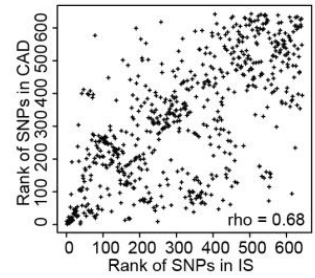

(B)

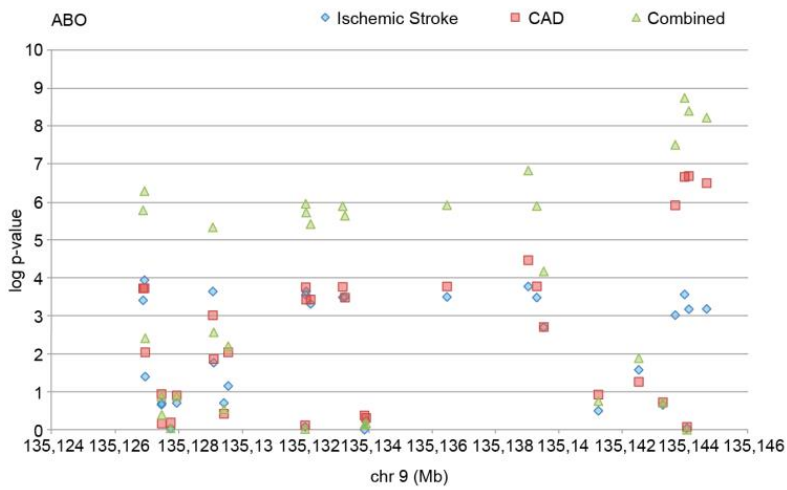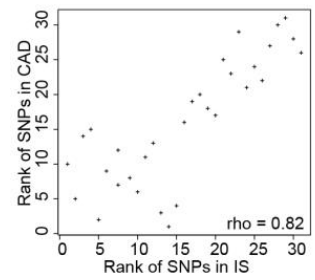

(C)

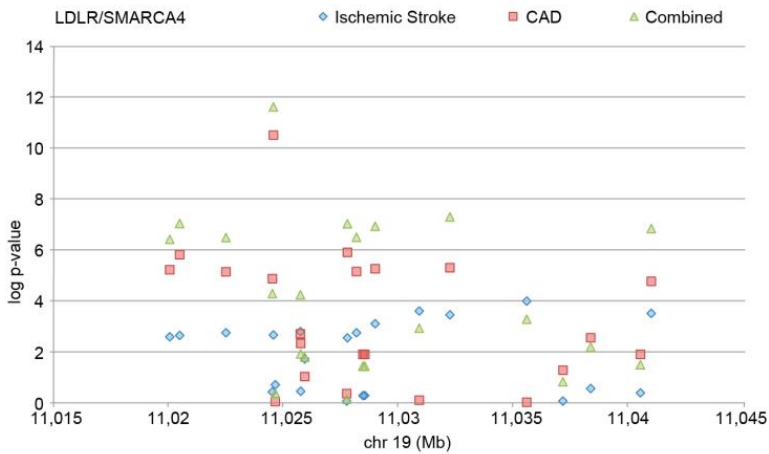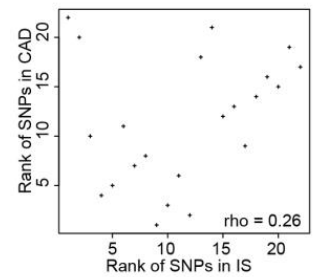

(D)

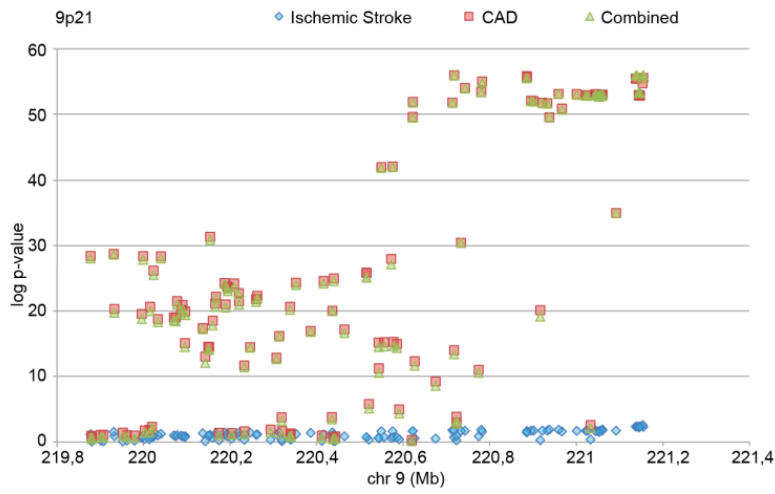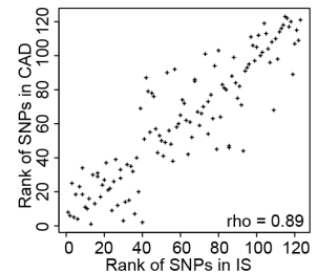

(E)

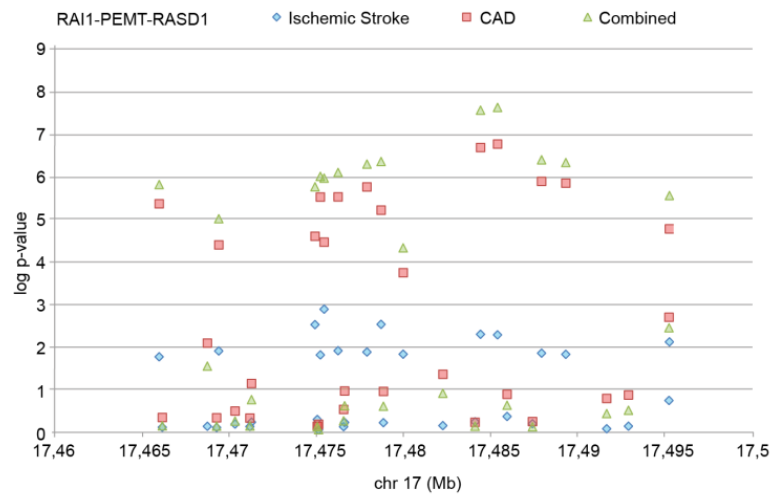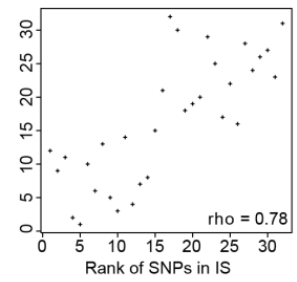

(F)

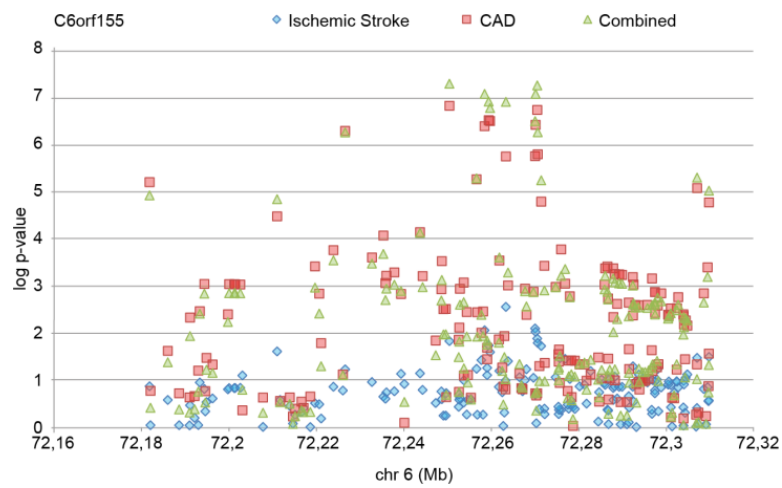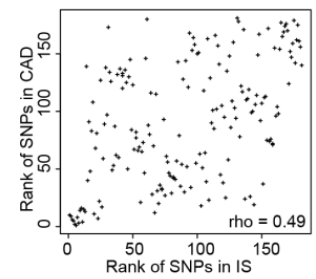



(G)

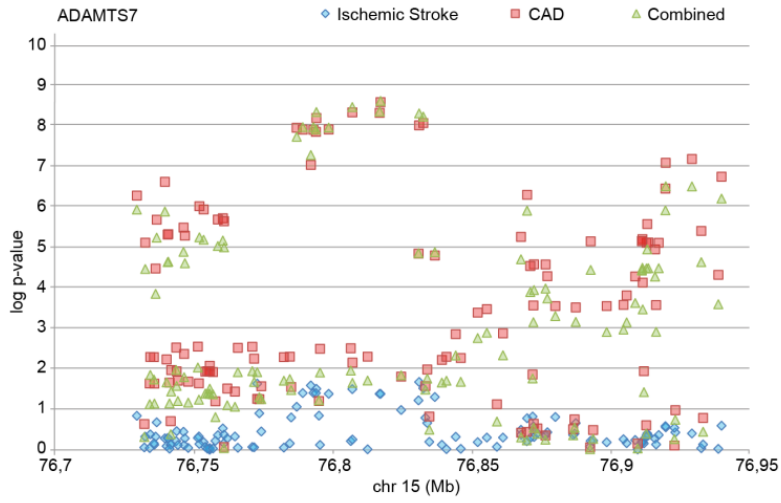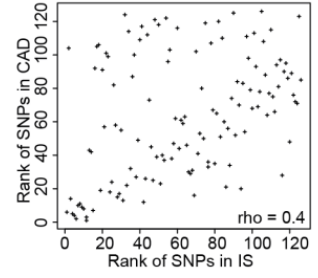

(H)

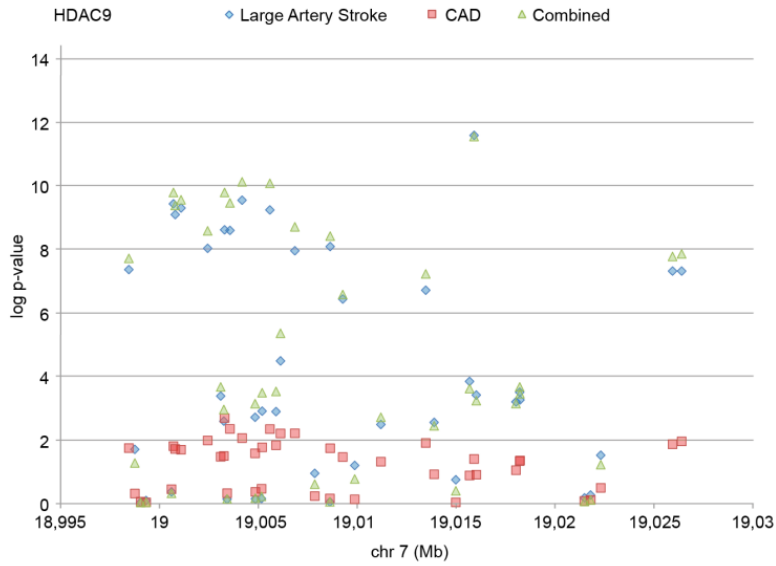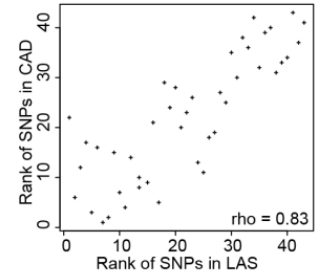

(I)

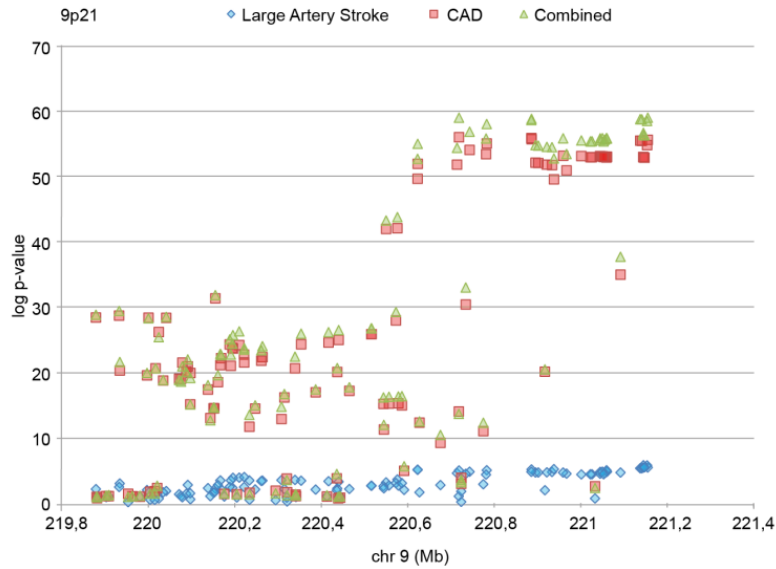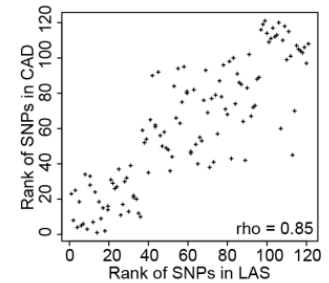

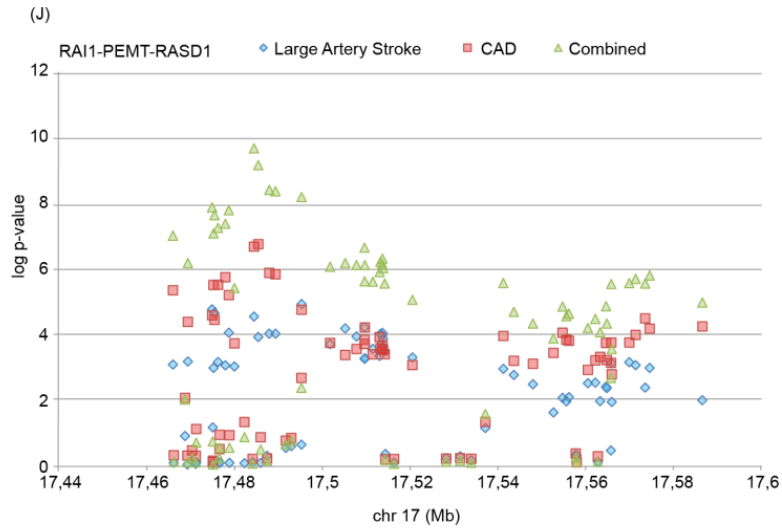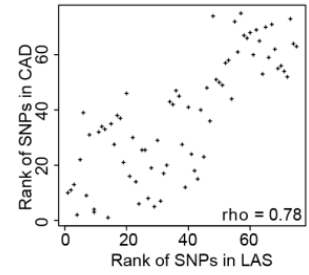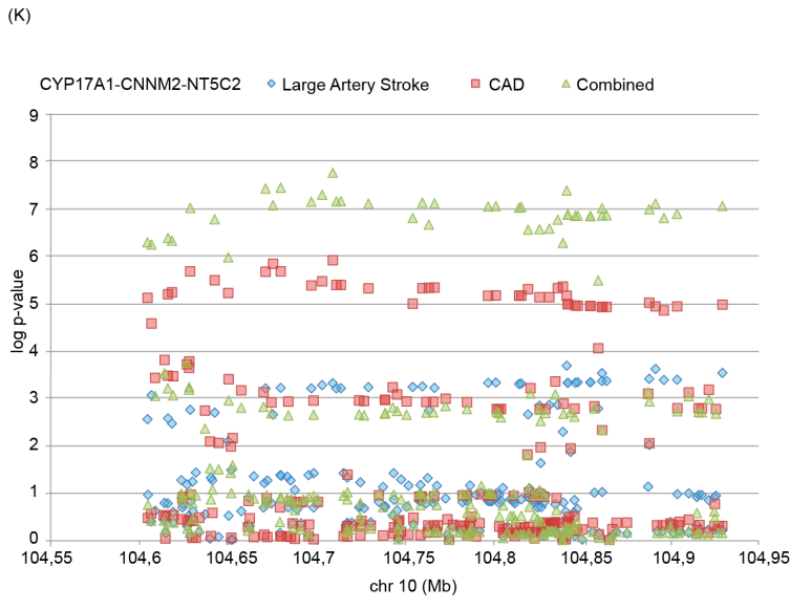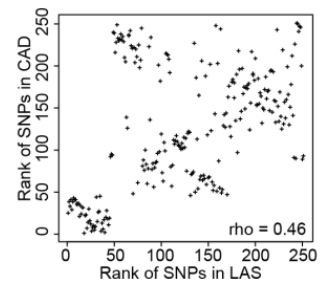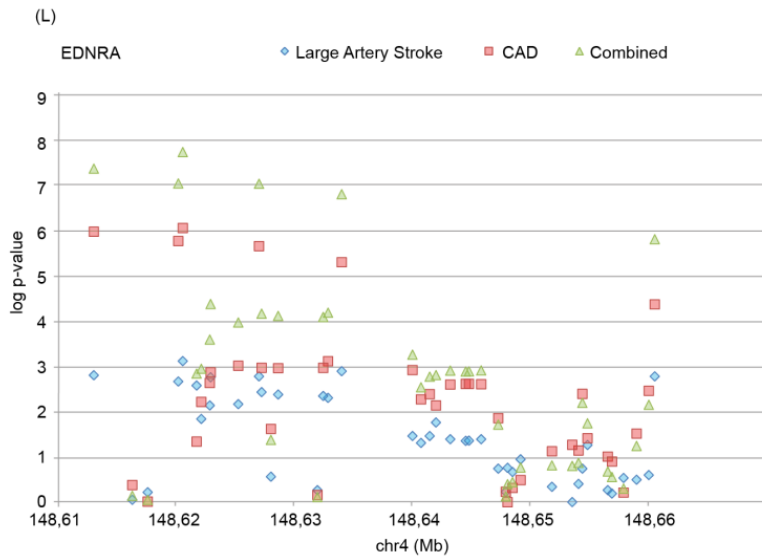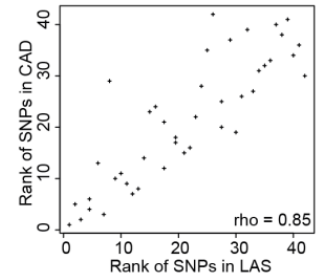

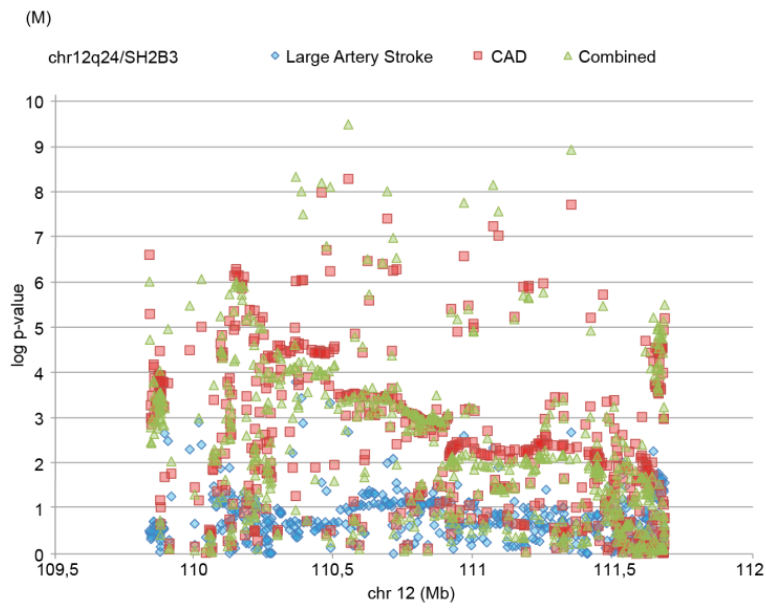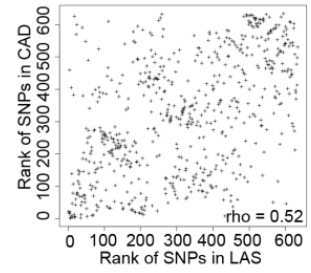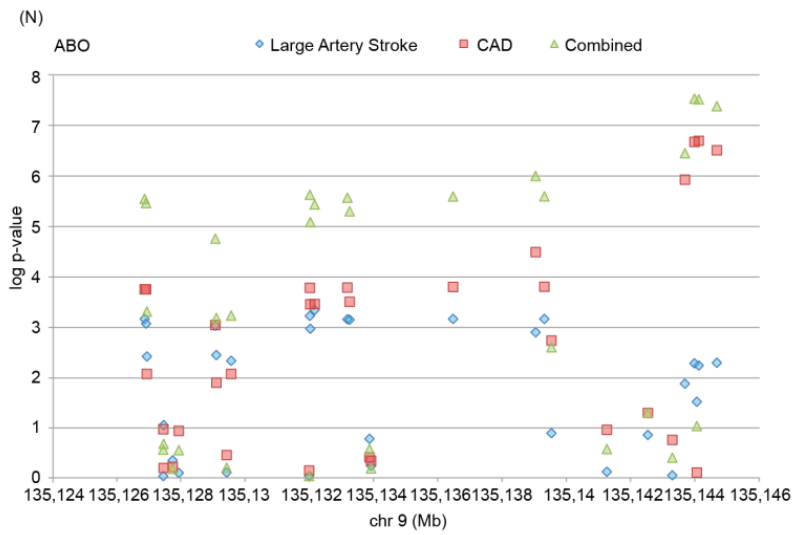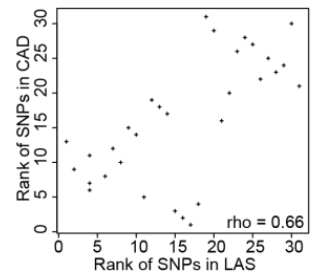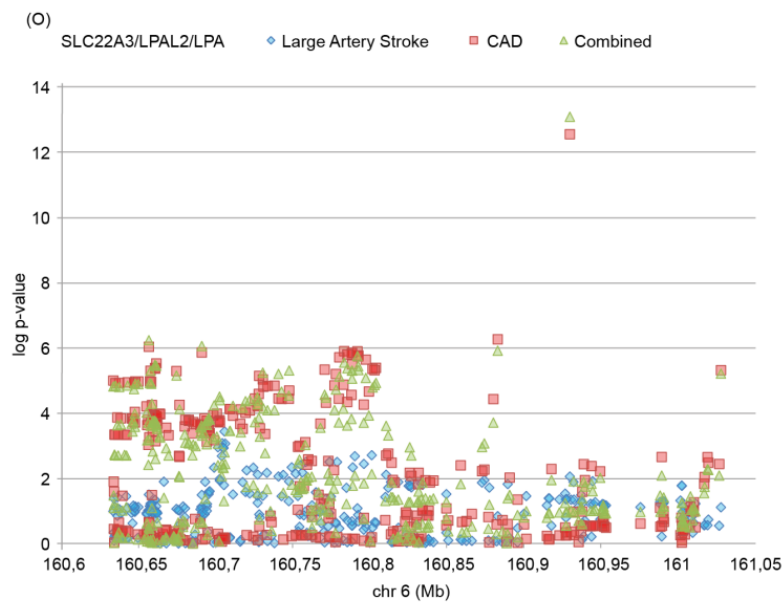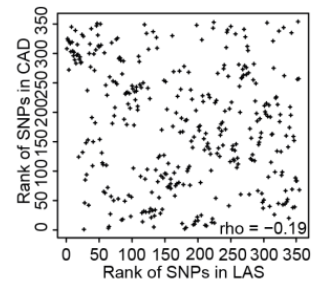

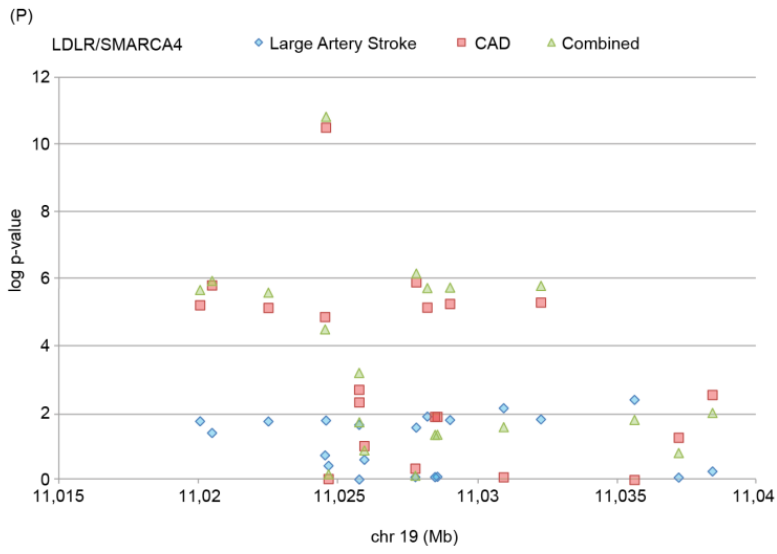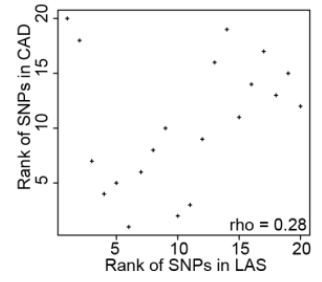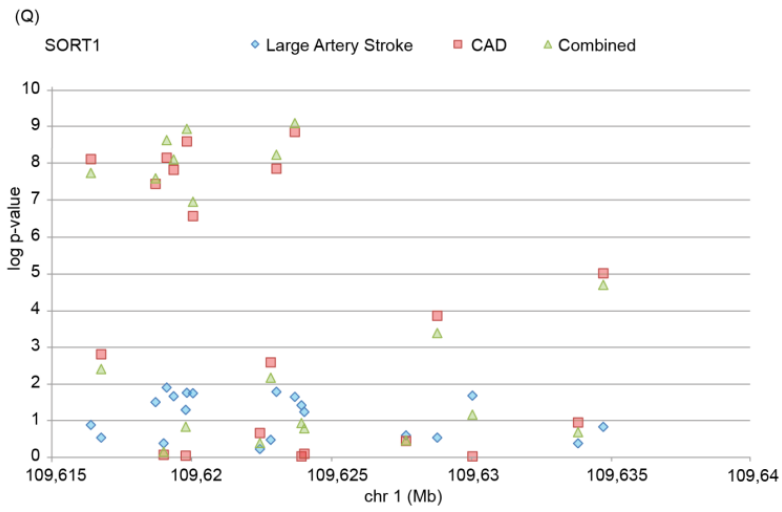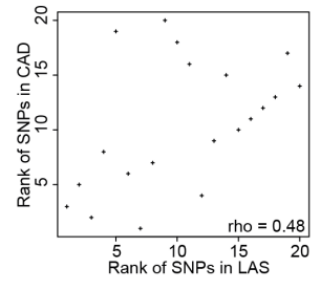

## Supplemental Figure Legends

**Supplementary Figure I:** Contingency tables for IS and CAD (**A**), LAS and CAD (**B**), and CES and CAD (**C**) for the number of variants showing a p-value above/below 0.01 (**left**) and above/below 0.0001 (**right**). For each table, LD-pruned data with  $r^2 < 0.3$  was used and the SNP with the lowest p-value in the original sample was retained. Similar results were obtained when using an  $r^2 < 0.1$  (data not shown).

**Supplementary Figure II:** Regional association plots (**left**) and corresponding Spearman correlation plots of p-values (**right**) for individual variants between IS and CAD (**A-G**) and LAS and CAD (**H-Q**) at the 10 loci that showed independent contributions from CAD and stroke in the phenotype-differentiated meta-analysis: (**A**) chr12q24/SH2B3; (**B**) ABO; (**C**) LDLR/SMARCA4; (**D**) 9p21; (**E**) RAI1-PEMT-RASD1; (**F**) C6orf155; (**G**) ADAMTS7; (**H**) HDAC9; (**I**) 9p21; (**J**) RAI1-PEMT-RASD1; (**K**) CYP17A1-CNNM2-NT5C2; (**L**) EDNRA; (**M**) chr12q24/SH2B3; (**N**) ABO; (**O**) SLC22A3/LPAL2/LPA; (**P**) LDLR/SMARCA4; (**Q**) SORT1. Data were drawn from METASTROKE and CARDIoGRAM.

### Supplemental References

1. Traylor M, Farrall M, Holliday EG, Sudlow C, Hopewell JC, Cheng YC, et al. Genetic risk factors for ischaemic stroke and its subtypes (the metastroke collaboration): A meta-analysis of genome-wide association studies. *Lancet neurology*. 2012;11:951-962
2. Schunkert H, König IR, Kathiresan S, Reilly MP, Assimes TL, Holm H, et al. Large-scale association analysis identifies 13 new susceptibility loci for coronary artery disease. *Nature genetics*. 2011;43:333-338
3. Coronary Artery Disease (C4D) Genetics Consortium. A genome-wide association study in europeans and south asians identifies five new loci for coronary artery disease. *Nature genetics*. 2011;43:339-344
4. CARDIoGRAMplusC4D Consortium, Deloukas P, Kanoni S, Willenborg C, Farrall M, Assimes TL, et al. Large-scale association analysis identifies new risk loci for coronary artery disease. *Nature genetics*. 2013;45:25-33
